# Supplementary material for: Boosting heterogeneous Fenton reactions for degrading organic dyes via the photothermal effect under neutral conditions
Source: Royal Society of Chemistry journal article supplement (doi:10.1039/d1en00874a), 2021-12-21
Supplement: d1en00874a1.pdf [file d1en00874a1.pdf]

Electronic supplementary Information (ESI)

*For*

Boosting Heterogeneous Fenton Reactions for  
Degrading Organic Dyes via Photothermal  
Effect under Neutral Conditions

Bin Yan<sup>a</sup>, Ziqi Shi<sup>a</sup>, Jiayou Lin<sup>a</sup>, Ling Zhang<sup>b\*</sup>, Linbo Han<sup>c</sup>, Xingwei Shi<sup>d</sup>, Qin Yang<sup>a\*</sup>

<sup>a</sup> National Engineering Laboratory for Clean Technology of Leather Manufacture,  
College of Biomass Science and Engineering, Sichuan University, Chengdu, 610065,  
China

<sup>b</sup> School of Chemical Engineering, Zhengzhou University, Zhengzhou, 450001, China

<sup>c</sup> College of Health Science and Environmental Engineering, Shenzhen Technology  
University, Shenzhen, China

<sup>d</sup> Beijing Key Laboratory of Ionic Liquids Clean Process, CAS Key Laboratory of Green  
Process and Engineering, Institute of Process Engineering, Chinese Academy of Sciences,  
Beijing 100190, China

\*Corresponding authors. E-mail: [yangqing@scu.edu.cn](mailto:yangqing@scu.edu.cn) (Q. Yang)

[zhang\\_ling@zzu.edu.cn](mailto:zhang_ling@zzu.edu.cn) (L. Zhang)

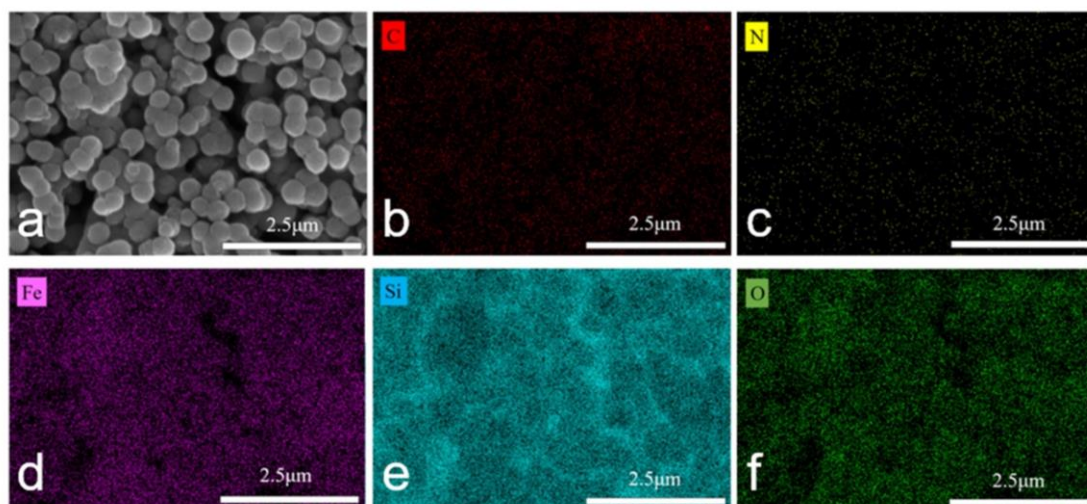

**Figure S1.** Distribution of MIC elements: (a) SEM; (b) C; (c) N; (d) Fe; (e) Si; (f) O.

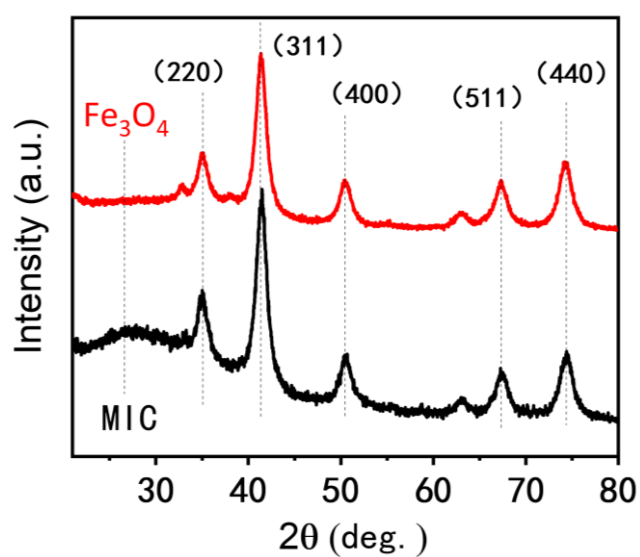

**Figure S2.** XRD pattern of the  $\text{Fe}_3\text{O}_4$  nanoparticles and MIC.

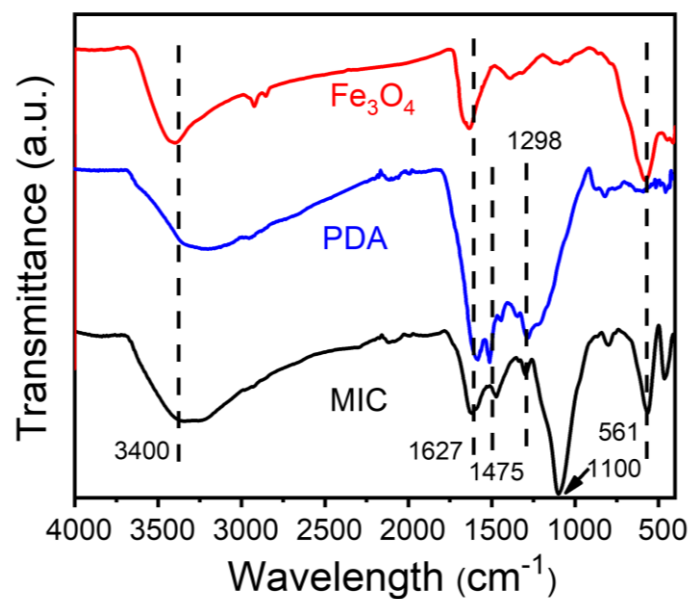

**Figure S3.** FTIR spectra of ultra-small  $\text{Fe}_3\text{O}_4$  nanoparticles, PDA and MIC.

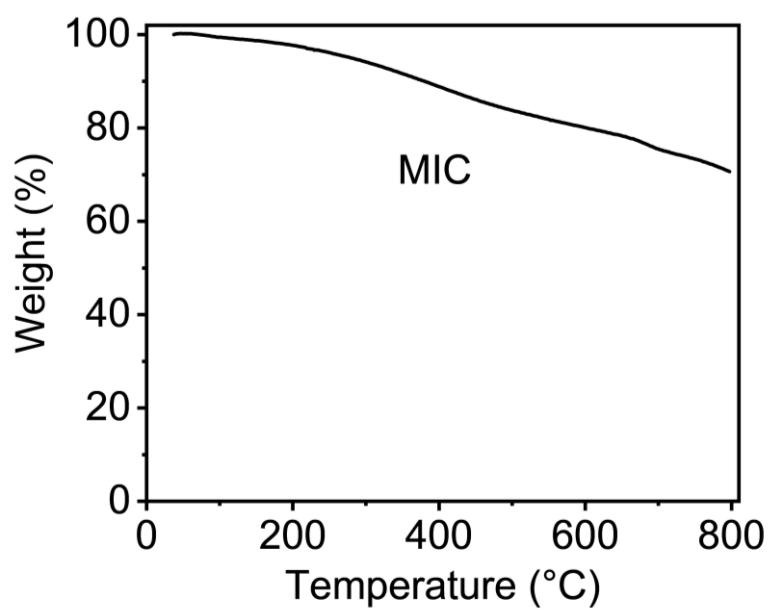

**Figure S4.** Thermogravimetric analysis (TGA) plot curve of MIC under with nitrogen atmosphere.

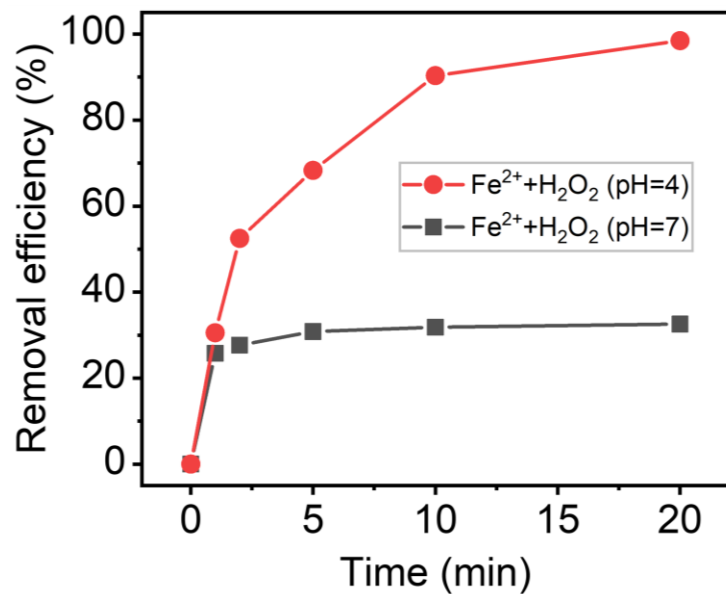

**Figure S5.** Homogeneous Fenton system (Fe<sup>2+</sup>+H<sub>2</sub>O<sub>2</sub>) degraded MB solution at pH=4 and pH=7.

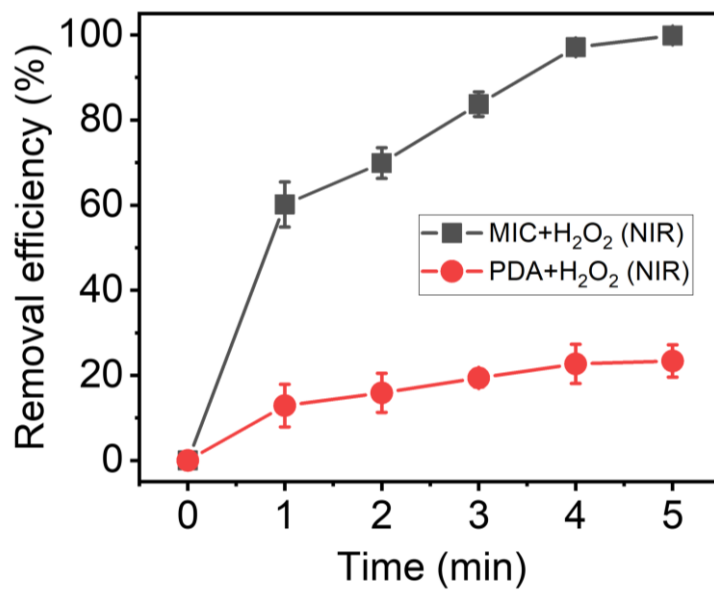

**Figure S6.** Removal efficiency of MIC+H<sub>2</sub>O<sub>2</sub> and PDA+H<sub>2</sub>O<sub>2</sub> to MB at different time.

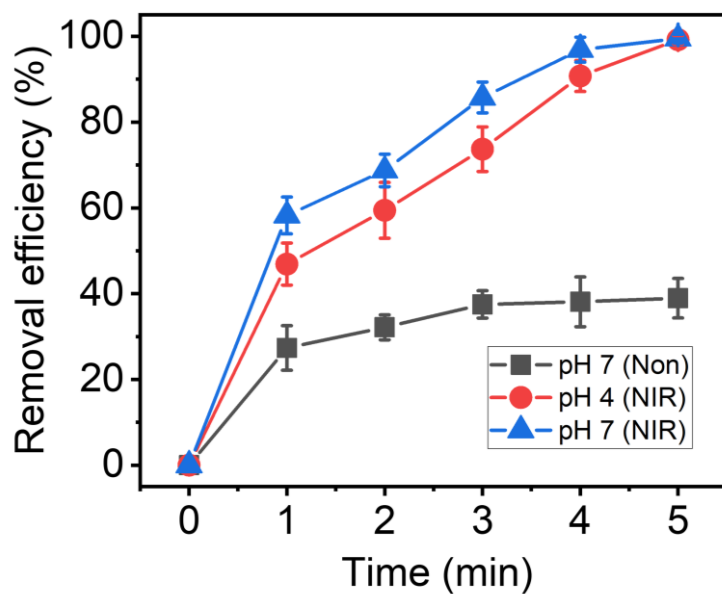

**Figure S7.** Effect of acid (pH 4) and neutral conditions on dye removal efficiency of MIC.

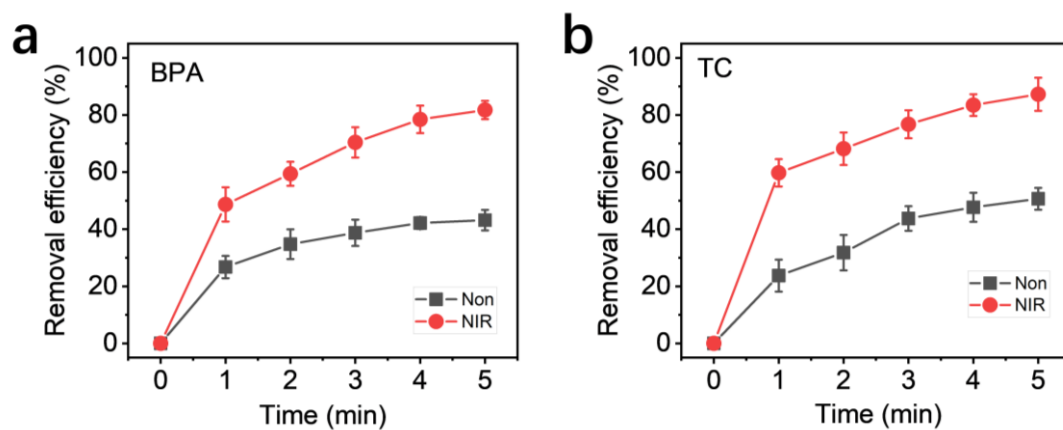

**Figure S8.** Degradation efficiency of MIC to BPA(a) and TC(b), (experimental conditions: MIC:  $250 \mu\text{g mL}^{-1}$ ; BPA:  $22.8 \text{ mg/L}$ , TC:  $100 \text{ mg/L}$ , pH 7).

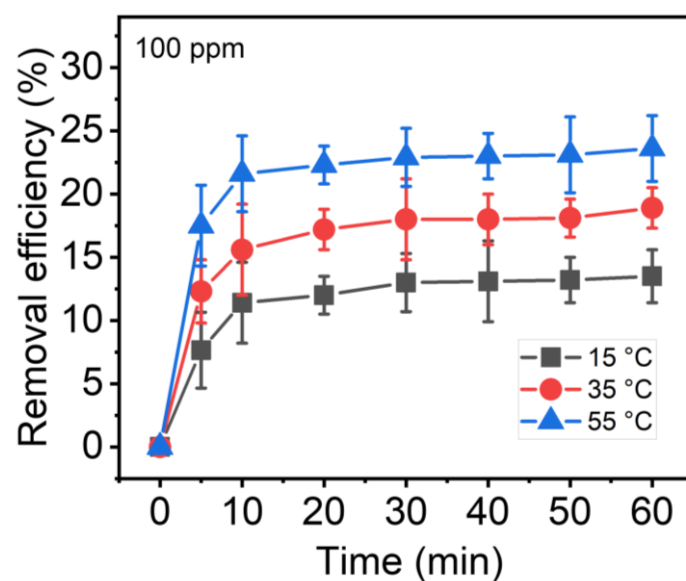

**Figure S9.** Effect of different temperatures on adsorption efficiency of MB by MIC (experimental conditions: MIC: 250  $\mu\text{g mL}^{-1}$ ; MB: 100 mg/L, pH 7).

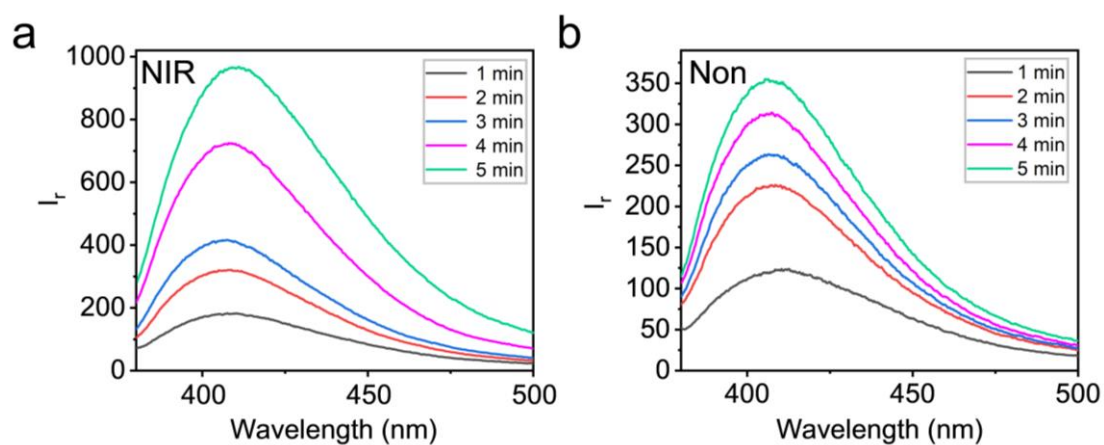

**Figure S10.** Fluorescence spectra of 2-hydroxyterephthalic acid (a) with or (b) without the NIR laser.

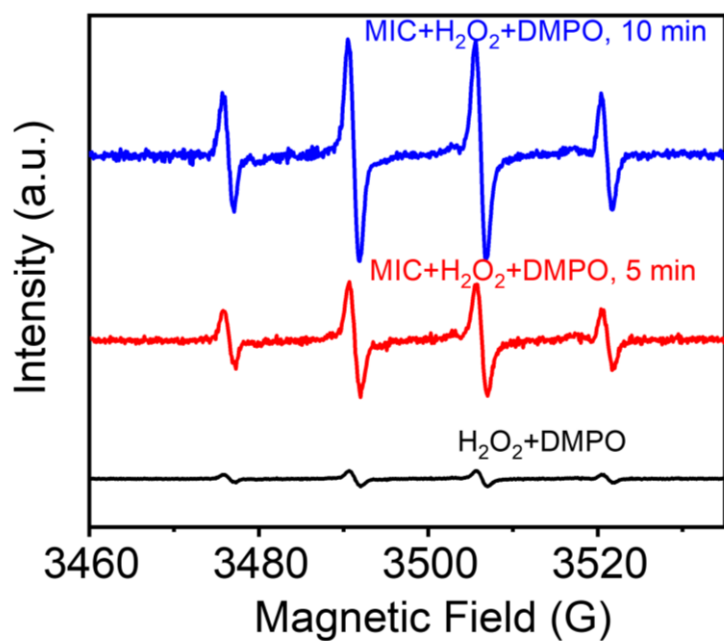

**Figure S11.** The EPR spectra of DMPO-OH adducts in the MIC+H<sub>2</sub>O<sub>2</sub> system.

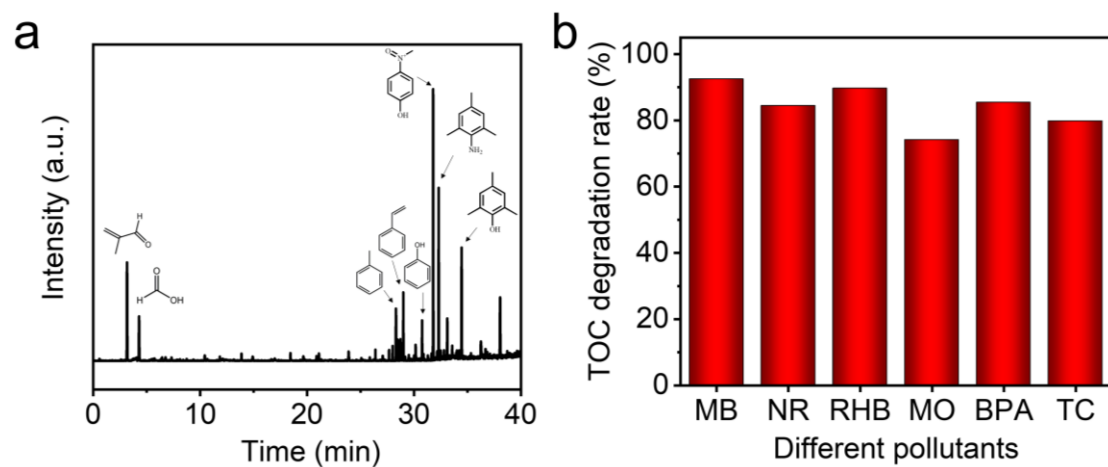

**Figure S12.** (a) GC-MS spectra in the degradation process of MB and (b) total organic carbon (TOC) degradation rate of different organic pollutants.

**Table S1.** Catalytic performance of multifarious Iron-based materials in different physical fields.

| Catalysts/<br>concentration                                      | Dye<br>concentration<br>(mg/L) | Time<br>(min) | Dye<br>removal<br>rate (%) | pH           | Physical<br>field                      | Refer-<br>ences |
|------------------------------------------------------------------|--------------------------------|---------------|----------------------------|--------------|----------------------------------------|-----------------|
| PCN-250<br>(Fe <sub>2</sub> Mn)/327 $\mu\text{g mL}^{-1}$        | 15                             | 270           | 100                        | 2.0-<br>12.0 | Full-<br>wavelength<br>halogen<br>lamp | 1               |
| Fe <sup>3+</sup> /2.8 $\mu\text{g mL}^{-1}$                      | 6                              | 8             | 100                        | 3.3          | VUV/UV                                 | 2               |
| BASF-NPs/250<br>$\mu\text{g mL}^{-1}$                            | 10                             | 140           | 100                        | 7.0          | UV                                     | 3               |
| Fe <sup>2+</sup> /20 $\mu\text{g mL}^{-1}$                       | 50                             | 6             | 98                         | 3.0          | Microwave<br>heating                   | 4               |
| Fe <sup>0</sup> /1000 $\mu\text{g mL}^{-1}$                      | 35                             | 5             | 99                         | 3.0          | Ultrasound                             | 5               |
| Fe <sub>3</sub> O <sub>4</sub> /ZnO/grap-<br>hene                | 40                             | 60            | 100                        | 13.0         | UV+US                                  | 6               |
| SUS/Fe <sub>3</sub> O <sub>4</sub> /200<br>$\mu\text{g mL}^{-1}$ | 10                             | 150           | 100                        | 7.0          | E beam                                 | 7               |
| <b>MIC (this<br/>work)</b> /250 $\mu\text{g mL}^{-1}$            | 100                            | 5             | 100                        | 7.0          | NIR<br>irradiation                     |                 |

## References

1. A. Kirchon, P. Zhang, J. Li, E. A. Joseph, W. Chen and H. C. Zhou, Effect of Isomorphic Metal Substitution on the Fenton and Photo-Fenton Degradation of Methylene Blue Using Fe-Based Metal-Organic Frameworks. *ACS Appl. Mater. Interfaces*, 2020, **12**, 9292-9299.
2. M. Li, Z. Qiang, C. Pulgarin and J. Kiwi, Accelerated methylene blue (MB) degradation by Fenton reagent exposed to UV or VUV/UV light in an innovative micro photo-reactor. *Appl. Catal., B*, 2016, **187**, 83-89.
3. G. A. Ashraf, R. T. Rasool, M. Hassan and L. Zhang, Enhanced photo Fenton-like activity by effective and stable Al-Sm M-hexaferrite heterogenous catalyst magnetically detachable for methylene blue degradation. *J. Alloy. Compd.*, 2020, **821**, 153410.



4. S.-T. Liu, J. Huang, Y. Ye, A.-B. Zhang, L. Pan and X.-G. Chen, Microwave enhanced Fenton process for the removal of methylene blue from aqueous solution. *Chem. Eng. J.*, 2013, **215-216**, 586-590.
5. C.-H. Weng and V. Huang, Application of  $\text{Fe}^0$  aggregate in ultrasound enhanced advanced Fenton process for decolorization of methylene blue. *J. Ind. Eng. Chem.*, 2015, **28**, 153-160.
6. R. Saleh and A. Taufik, Degradation of methylene blue and congo-red dyes using Fenton, photo-Fenton, sono-Fenton, and sonophoto-Fenton methods in the presence of iron(II,III) oxide/zinc oxide/graphene ( $\text{Fe}_3\text{O}_4/\text{ZnO}/\text{graphene}$ ) composites. *Sep. Purif. Technol.*, 2019, **210**, 563-573.
7. Y. J. Choe, J. Kim, J. Y. Byun and S. H. Kim, An electro-Fenton system with magnetite coated stainless steel mesh as cathode. *Catal. Today*, 2021, **359**, 16-22.
